# Supplementary material for: Real-world analysis of autologous stem cell transplantation in primary central nervous system lymphoma using Taiwan Blood and Marrow Transplantation Registry (TBMTR)
Source: Research Square preprint supplement (doi:10.21203/rs.3.rs-6846411/v1), 2025-06-17
Supplement: Supplementary file 1 [file e837cea6435d243399cf5c12.docx]

**Supplementary Figures and Tables**

| 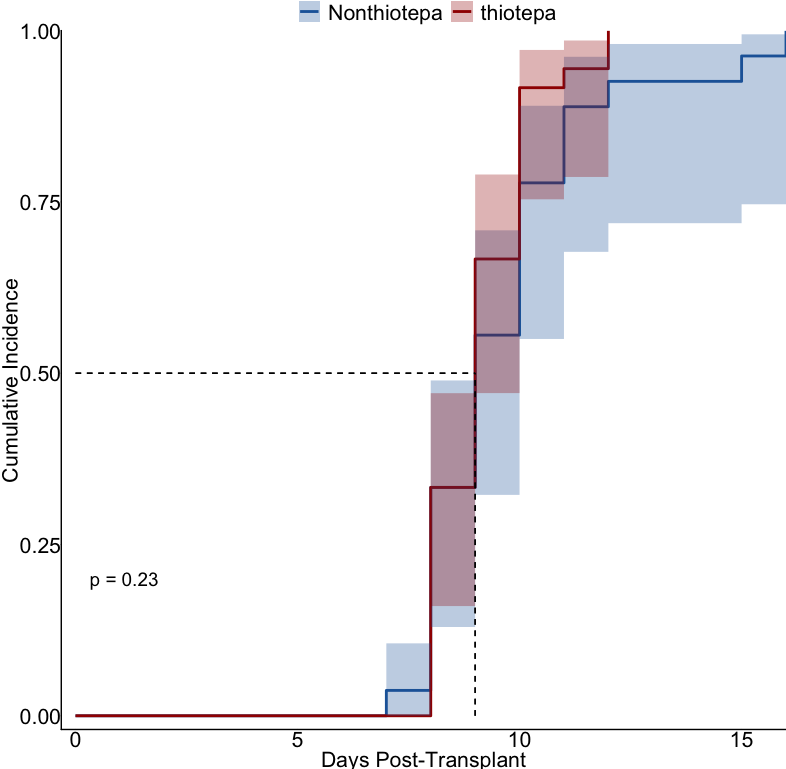 |
| --- |

**Supplementary Figure 1. Time to neutrophil engraftment by conditioning regimen** Cumulative incidence curves demonstrate comparable neutrophil engraftment times between patients receiving thiotepa-based and non-thiotepa conditioning regimens

| 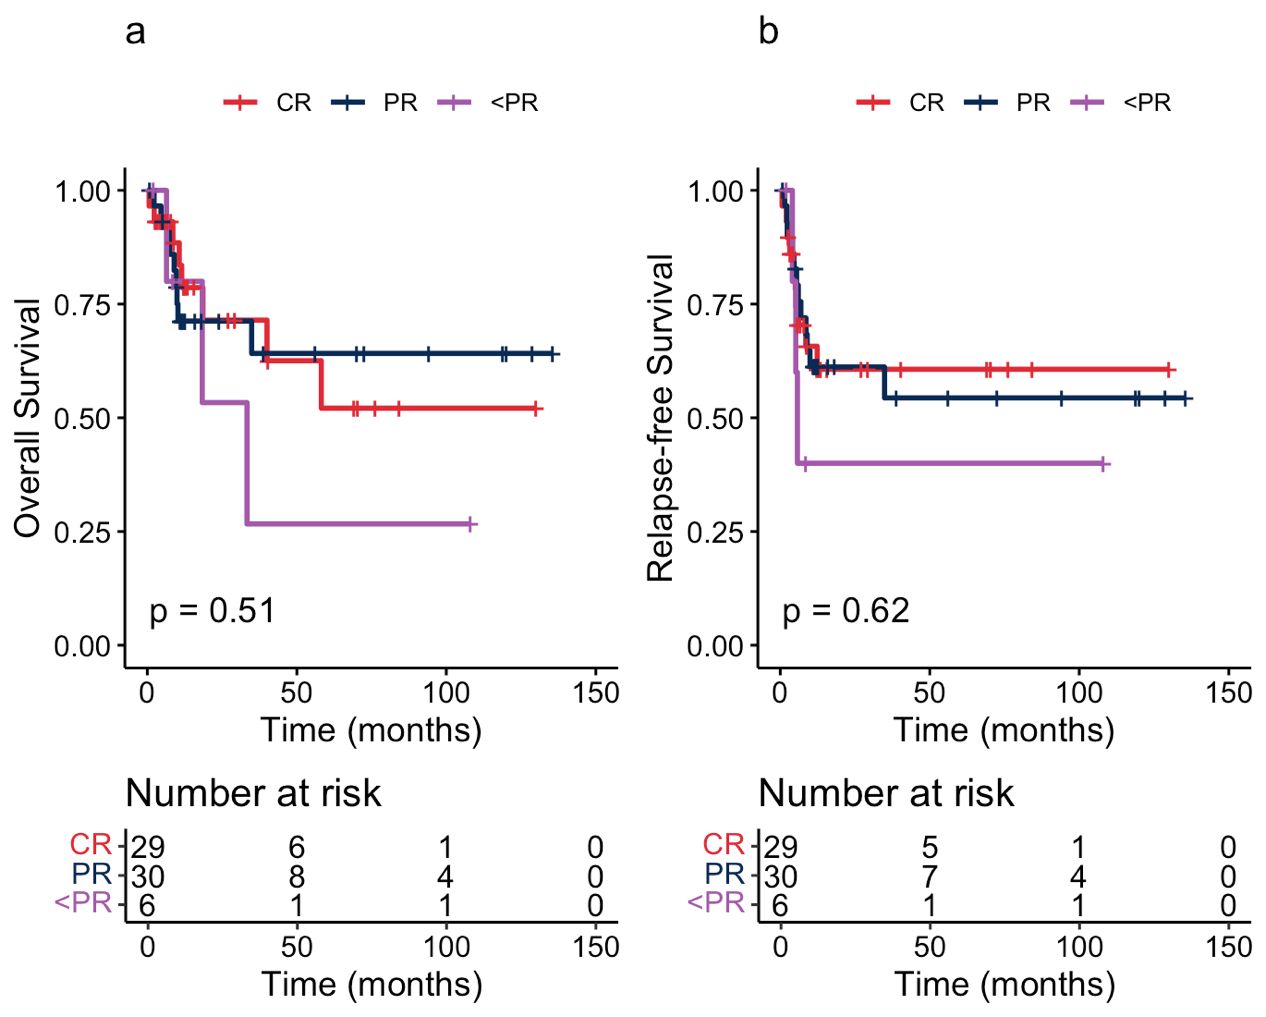 |
| --- |

**Supplementary Fig 2.** **Survival outcomes by pre-transplant disease status in all HDC/ASCT patients**

Kaplan–Meier curves of (a) overall survival and (b) relapse-free survival stratified by disease status before transplantation. No significant differences in survival were observed among the groups

| 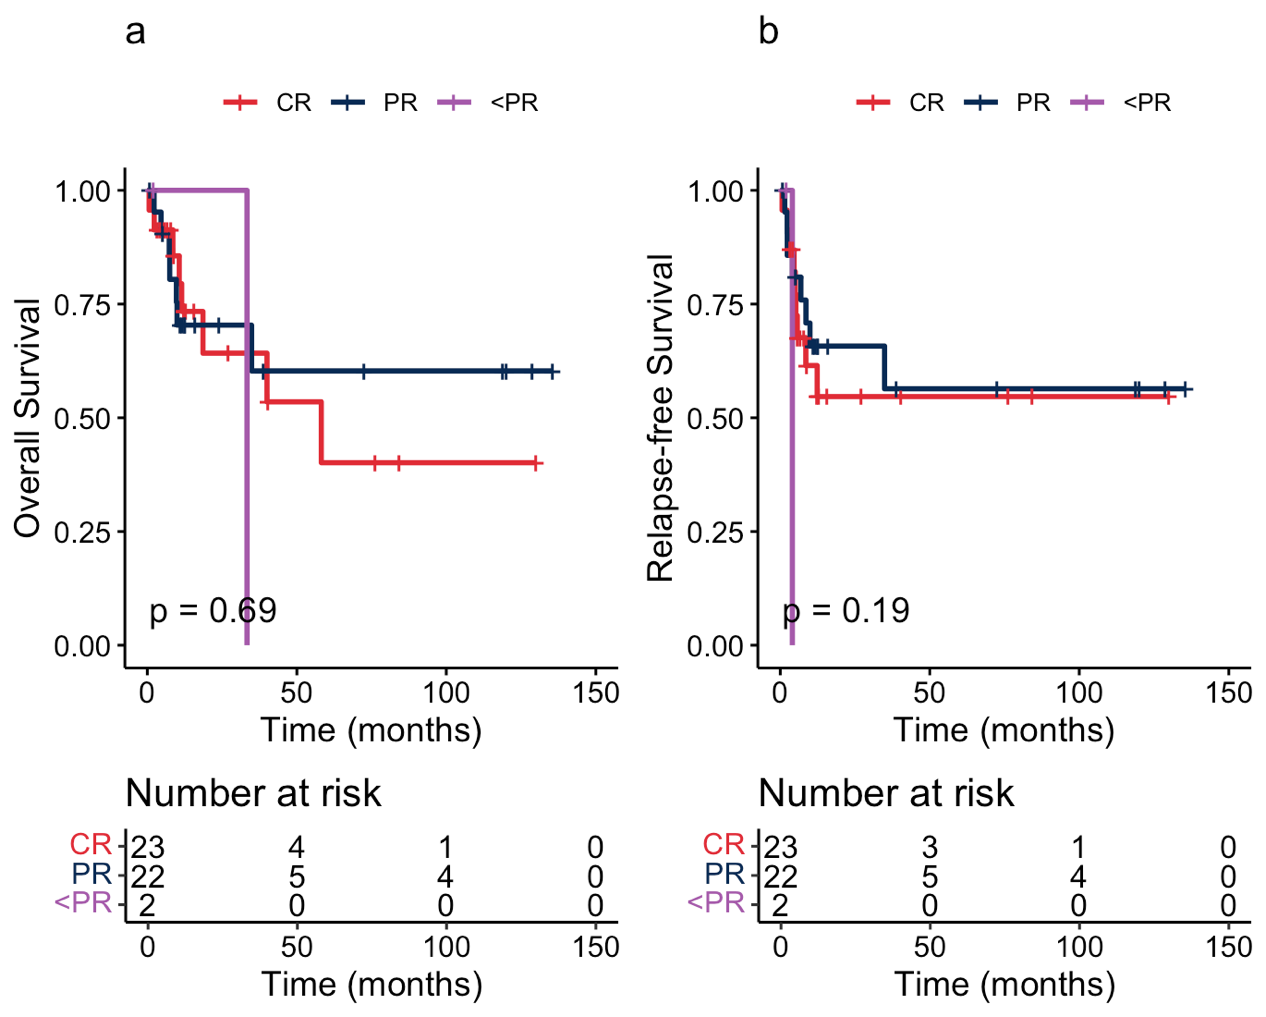 |
| --- |

**Supplementary Fig 3.** **Survival outcomes by pre-transplant disease status in frontline HDC/ASCT patients**

Kaplan–Meier curves of (a) overall survival and (b) relapse-free survival stratified by disease status before transplantation. No significant differences in survival were observed among the groups.

**Supplementary Table 1.** Cause of mortality in frontline autologous HDC/ASCT

|  | Frontline | Thiotepa | Non-thiotepa |
| --- | --- | --- | --- |
| Patients, n | 47 | 29 | 18 |
| Mortality, n (%) | 16 (34.0) | 8 (27.6) | 8 (44.4) |
| Relapse, n (%) | 13 (27.1) | 7 (24.1) | 6 (33.3) |
| Major cause of mortality, n (%) |  |  |  |
| Disease-related | 10 (62.5) | 5 (62.5) | 5 (62.5) |
| Infection | 5 (31.3) | 3 (37.5) | 2 (25.0) |
| Other | 1 (6.3) | 0 (0.0) | 1 (12.5) |

HDC/ASCT: high-dose chemotherapy with autologous stem-cell transplant

**Supplementary Table 2.** Patients’ baseline characteristics in frontline autologous HDC/ASCT group

|  | Frontline | Thiotepa | Non-thiotepa |
| --- | --- | --- | --- |
| Patient, n | 47 | 29 | 18 |
| Age, median (range) | 58 (39-78) | 59 (46-78) | 55 (39-69) |
| Age >60 y/o, n (%) | 20 (42.5) | 14 (48.2) | 6 (33.3) |
| Sex (male), n (%) | 24 (51.1) | 17 (58.6) | 7 (38.9) |
| LDH (U/L) | 182.5 (98-1730) | 182.5 (98-290) | 206 (147-1730) |
| IT, n (%) | 21 (44.7) | 14 (48.3) | 7 (38.9) |
| Best response before HDC/ASCT, n (%) |  |  |  |
| CR | 23 (48.9) | 13 (44.8) | 10 (55.6) |
| PR | 22 (46.8) | 15 (51.7) | 7 (38.9) |
| < PR | 2 (4.2) | 1 (3.4) | 1 (5.6) |

CR: complete remission, IT: Intrathecal therapy, LDH: lactate dehydrogenase, HDC/ASCT: high-dose chemotherapy with autologous stem-cell transplant, PR: partial remission
